# Supplementary material for: Implementation of a Neonatal Hyperbilirubinemia Clinical Pathway in a Pediatric Emergency Department
Source: PubMed Central journal article supplement — Pediatr Qual Saf. 2024 Nov 20;9(6):e774. doi: 10.1097/pq9.0000000000000774 (PMC11578199; doi:10.1097/pq9.0000000000000774), 2024-11-20
Supplement: pqs-9-e774-s002.pdf [file pqs-9-e774-s002.pdf]

# PRE-IMPLEMENTATION HYPERBILIRUBINEMIA SURVEY

## ROLE:

CURRENT ROLE WITHIN THE DEPARTMENT

HOW MANY YEARS HAVE YOU WORKED IN THE UNIT

## INSTRUCTIONS:

the following questions ask you about your current experience with Hyperbilirubinemia patients. Please circle the number that most closely indicates how the current process works.

### QUESTIONS:

### RATING SCALE:

Not at all   Not very   Neutral   Somewhat   Very

How knowledgeable are you with management of neonatal hyperbilirubinemia?

    

How knowledgeable are you about the complications of untreated hyperbilirubinemia?

    

How Knowledgeable are you with risk factors of hyperbilirubinemia?

    

How satisfied are you with the management of neonatal hyperbilirubinemia in the ED?

    

How comfortable are you performing heel sticks to obtain blood samples from a neonate?

    

How often do you think treatment for infants with hyperbilirubinemia is delayed in the ED?

    

How likely are you to place a PIV to draw labs from Neonate presenting with hyperbilirubinemia?

# POST-IMPLEMENTATION HYPERBILIRUBINEMIA SURVEY

## ROLE:

CURRENT ROLE WITHIN THE DEPARTMENT

HOW MANY YEARS HAVE YOU WORKED IN THE UNIT

## INSTRUCTIONS:

the following questions ask you about your current experience with Hyperbilirubinemia patients. Please circle the number that most closely indicates how the current process works.

### QUESTIONS:

### RATING SCALE:

Not at all   Not very   Neutral   Somewhat   Very

How knowledgeable are you with management of neonatal hyperbilirubinemia?

How knowledgeable are you about the complications of untreated hyperbilirubinemia?

How Knowledgeable are you with risk factors of hyperbilirubinemia?

How satisfied are you with the management of neonatal hyperbilirubinemia in the ED?

How comfortable are you performing heel sticks to obtain blood samples from a neonate?

How often do you think treatment for infants with hyperbilirubinemia is delayed in the ED?

How likely are you to place a PIV to draw labs from Neonate presenting with hyperbilirubinemia?

How Satisfied are you with the Neonatal Hyperbilirubinemia Clinical Pathway?

Have you used the Neonatal Hyperbilirubinemia Clinical Pathway?

 YES    NO

How satisfied are you with the education provided regarding the Neonatal Hyperbilirubinemia Pathway?

Do you have any suggestion on how to improve the clinical pathway?
