# Supplementary figures and images for: Implementation of a Neonatal Hyperbilirubinemia Clinical Pathway in a Pediatric Emergency Department
Source: PubMed Central journal article supplement — Pediatr Qual Saf. 2024 Nov 20;9(6):e774. doi: 10.1097/pq9.0000000000000774 (PMC11578199; doi:10.1097/pq9.0000000000000774), 2024-11-20

## Process Map Pre-Implementation

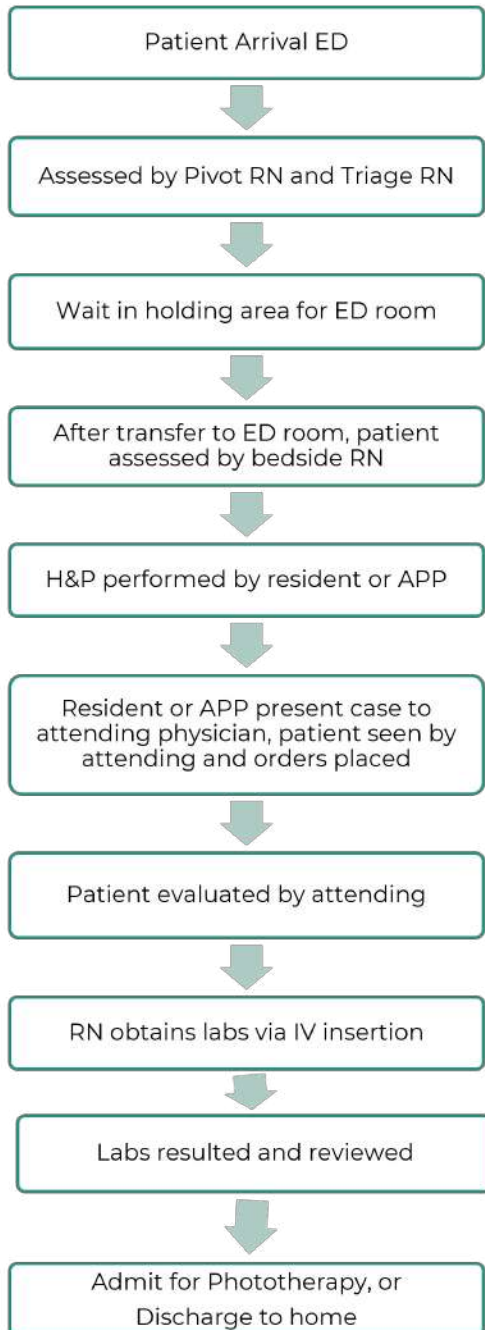

## Process Map Post-Implementation

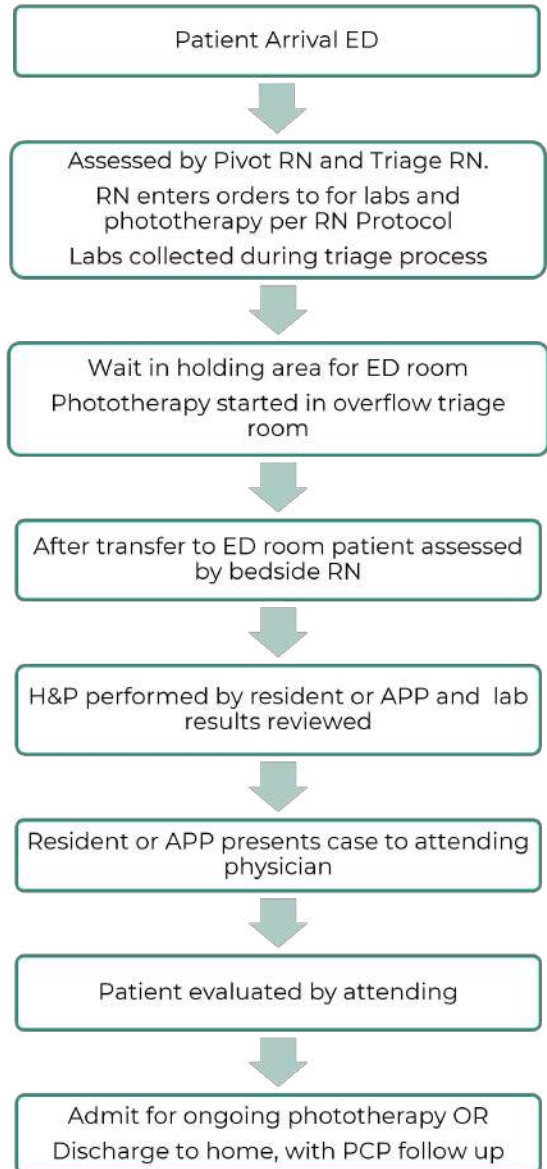

Supplement: pqs-9-e774-s001.pdf [file pqs-9-e774-s001.pdf]

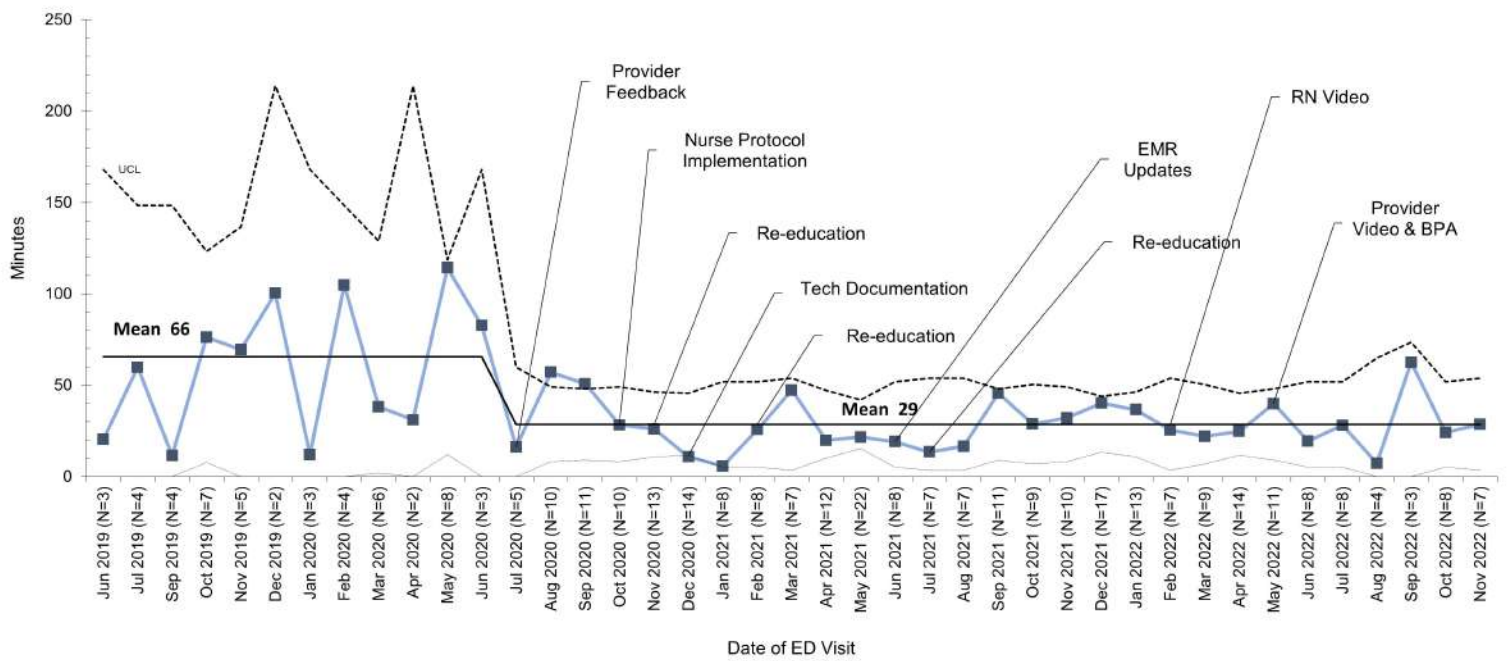

Supplement: pqs-9-e774-s003.pdf [file pqs-9-e774-s003.pdf]

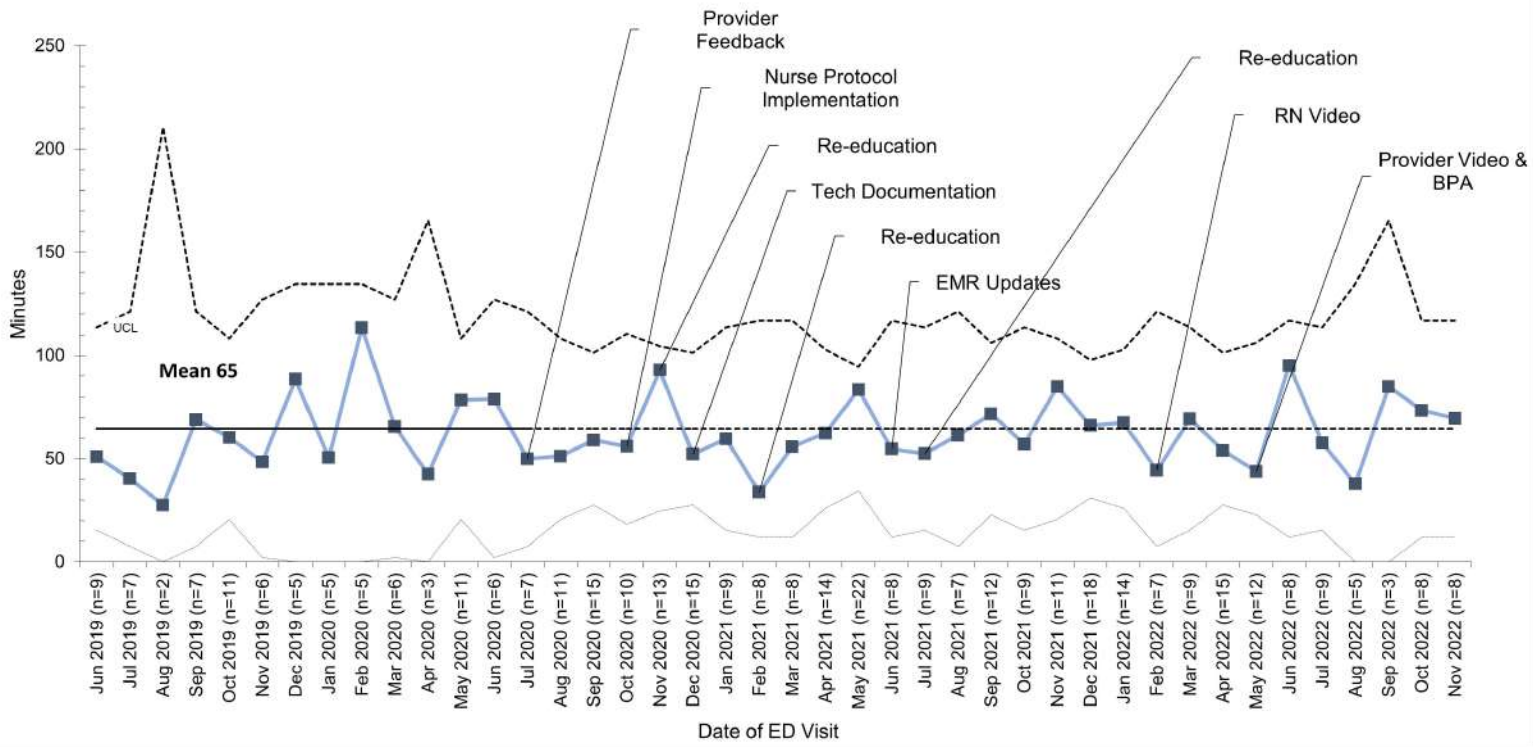

Supplement: pqs-9-e774-s004.pdf [file pqs-9-e774-s004.pdf]
